# Supplementary material
Source: Springer Nature journal article supplement (https://www.springermedizin.de/resource/supplementary/12875_2011_700_MOESM1_ESM.pdf/9435208)
Supplement: MOESM1 [file 9435208]

**Phase 1: Health professional measures weight and height and calculates BMI**

**Phase 2: Health professional diagnoses overweight using their clinical judgement**

**Phase 3: Health professional tries to refer to obesity prevention intervention**

**Phase 4: Health professional successfully refers to obesity prevention intervention**

**Phase 5: Parents decide to participate**

Child is overweight according to age-and sex-specific BMI cut-off points

Diagnosis

No diagnosis

Attempt to refer

No attempt to refer

Referral

No referral

Participation

No participation

*Current study*
